# Supplementary material for: Srs2 helicase prevents the formation of toxic DNA damage during late prophase I of yeast meiosis
Source: bioRxiv or medRxiv preprint supplement (doi:10.1101/518035), 2019-01-11

1 **Table S1: Strain list**

| <b>Strain Name</b> | <b>Genotype</b>                                                                                                                              |
|--------------------|----------------------------------------------------------------------------------------------------------------------------------------------|
| MSY832             | <i>MAT α, ho::LYS2, ura3, leu2::hisG, trp1::hisG, lys2</i>                                                                                   |
| MSY833             | <i>MAT a, ho::LYS2, ura3, leu2::hisG, trp1::hisG, lys2</i>                                                                                   |
| NKY1543            | <i>MAT α, ho::LYS2, ura3, leu2::hisG, lys2, his4X::LEU2-URA3, arg4-bgl</i>                                                                   |
| NKY1303            | <i>MAT a, ho::LYS2, ura3, leu2::hisG, lys2, his4B::LEU2, arg4-nsp</i>                                                                        |
| HSY315             | <i>NKY1543, srs2::TRP1, trp1::hisG</i>                                                                                                       |
| HSY310             | <i>NKY1303, srs2::TRP1, trp1::hisG</i>                                                                                                       |
| LPY071             | <i>MYS832, srs2::TRP1</i>                                                                                                                    |
| LPY072             | <i>MSY833, srs2::TRP1</i>                                                                                                                    |
| HSY596             | <i>MSY 833 with ndt80::LEU2</i>                                                                                                              |
| HSY597             | <i>MSY 832 with ndt80::LEU2</i>                                                                                                              |
| LPY058             | <i>MSY 833 with ndt80::LEU2, srs2::TRP1</i>                                                                                                  |
| LPY059             | <i>MSY 832 with ndt80::LEU2, srs2::TRP1</i>                                                                                                  |
| HSY185             | <i>MSY 833 with spo11-Y135F::KanMX6</i>                                                                                                      |
| HSY186             | <i>MSY 832 with spo11-Y135F::KanMX6</i>                                                                                                      |
| HSY462             | <i>MSY 833 with spo11-Y135F::KanMX6, srs2::TRP1</i>                                                                                          |
| HSY463             | <i>MSY 832 with spo11-Y135F::KanMX6, srs2::TRP1</i>                                                                                          |
| YFY74              | <i>MSY 833 with cdc20::pCLB2-CDC20::KanMX6</i>                                                                                               |
| YFY77              | <i>MSY 832 with cdc20::pCLB2-CDC20::KanMX6</i>                                                                                               |
| YFY80              | <i>MSY 833 with cdc20::pCLB2-CDC20::KanMX6, srs2::TRP1</i>                                                                                   |
| YFY83              | <i>MSY 832 with cdc20::pCLB2-CDC20::KanMX6, srs2::TRP1</i>                                                                                   |
| YFY03              | <i>MSY 833 with cdc20::pCLB2-SGS1::KanMX6</i>                                                                                                |
| YFY05              | <i>MSY 832 with cdc20::pCLB2- SGS1::KanMX6</i>                                                                                               |
| H7790              | <i>MAT a, ho:: LYS2, URA3, leu2::hisG, his3::hisG, trp1::hisG, lys2, fpr::KanMX4, RPL13A-2xFKBP12::TRP1, tor1-1::HIS3, RAD54-FRB::KanMX6</i> |
| H7791              | <i>MAT α, ho:: LYS2, ura3, LEU2, his3::hisG, trp1::hisG, lys2, fpr::KanMX4 RPL13A-2xFKBP12::TRP1, tor1-1::HIS3, RAD54-FRB::KanMX6</i>        |

HYS82 H7790 with *srs2::TRP1*

HYS71 H7791 with *srs2::TRP1*

---

1

2

1 **Supplemental Figure Legends**

2

3 **Supplemental Figure S1. Physical analysis of meiotic recombination in**  
4 ***srs2* mutant.**

5 A. Schematic representation of the *HIS4-LEU2* recombination hotspot.

6 B. DSB formation (top) and CON/NCO formation (bottom) at the *HIS4-LEU2*  
7 locus in the wild type and *srs2* strains were verified by Southern blotting.  
8 Genomic DNA was digested with *Pst*I for DSB and with *Xho*I+*Mlu*I for  
9 CON/NCO.

10 C. E. Kinetic analyses of meiotic DSBs and CO/NCO formation. Parental and  
11 DSB bands were quantified and % of DSB (top graph) and CO (second  
12 graph) or NCO (third graph) was calculated. Graphs show the mean values  
13 with variation (n=2). Wild type cells (blue circles; NKY1303/1543) and *srs2*  
14 cells (red circles; HSY310/315).

15 D. F. Immunostaining analysis of a SC protein, Zip1 (green), was carried out in  
16 wild type and mutant cells. Representative images are shown for each strain.  
17 Wild type, MSY832/833; and *srs2* (HSY310/315). The bar indicates 2  $\mu$ m.

18 E. G. Kinetics of SC formation. Zip1 staining in wild type and mutant cells was  
19 classified shown in (H). Zip1 staining in the wild type and mutant cells was  
20 classified as follows: dot (Class I, blue); partial linear (Class II, green); full SC  
21 (Class III, red). Spreads containing Zip1 lines were classified into two classes  
22 with less than 5 (class II, zygotene) and more than 5 (class III, pachytene)  
23 Zip1 dots. A minimum of 100 cells were analysed per time point. Wild type  
24 cells, MSY832/833; *srs2* cells, HSY310/315.

25 F. H. Kinetics of Zip1-polycomplexes in wild-type and *srs2* cells. The spreads  
26 containing Zip1-polycomplexes (arrow in F) were counted at each time point.

27

28 **Supplemental Figure S2. Rad52 and Hed1 staining in *srs2* mutant.**

29 A. Immunostaining analysis of Rad51 (green) and Dmc1 (red) on chromosome  
30 spreads in wild type (NKY1303/1543) and *srs2* (HSY310/315) mutant cells.  
31 Representative image with or without DAPI (blue) dye at 4 and 8 h for wild  
32 type and the *srs2* cells is shown. The bar indicates 2  $\mu$ m.

33 B. Western blotting analysis of Dmc1 and Mei5 proteins during meiosis. Cell

1 lysates at different time points in meiosis in wild type (NKY1303/1543) and  
2 *srs2* (HSY310/315) cells were probed with anti-Dmc1, anti-Mei5 and  
3 anti-tubulin.

4 C. Immunostaining analysis of Rad51 (green) and Rad52 (red) on chromosome  
5 spreads in wild type (NKY1303/1543) and *srs2* (HSY310/315) cells.  
6 Representative image with or without DAPI (blue) dye at 4 and 7 h for wild  
7 type and the *srs2* is shown. The bar indicates 2  $\mu$ m.

8 D. Kinetics of Rad52 focus-positive cells in various yeast strains. The focus and  
9 aggregates were counted as shown in (D). Graphs show kinetics of one  
10 representative experiment for the wild-type cells (top; NKY1303/1543), and  
11 *srs2* cells (bottom; HSY310/315). Closed circles, Rad51 foci in wild type;  
12 open circles, Rad51 foci in *srs2*; open diamonds, Rad51 aggregates in *srs2*;  
13 closed triangles, Rad52 foci in wild type; open triangles, Rad52 foci in *srs2*;  
14 open square, Rad52 aggregates in *srs2*.

15 E. Immunostaining analysis of Hed1 (red) and Rad51 (green) on chromosome  
16 spreads in wild type (NKY1303/1543) and *srs2* (HSY310/315) cells.  
17 Representative image with or without DAPI (blue) dye at 4 and 8 h for wild  
18 type and the *srs2* is shown. The bar indicates 2  $\mu$ m.

19 F. Kinetics of Rad51 or Hed1 focus-positive cells in various yeast strains. A  
20 spread with the foci of Rad51 or Hed1 is defined as a cell with more than five  
21 foci. Spreads containing Rad51/Hed1 aggregates were also counted. A  
22 minimum of 100 cells were analysed at each time point. Graphs show  
23 kinetics of one representative experiment for the wild type cells (top;  
24 NKY1303/1543), and *srs2* cells (bottom; HSY310/315). Closed circles,  
25 Rad51 foci in wild type; open circles, Rad51 foci in *srs2*; open diamonds,  
26 Rad51 aggregates in *srs2*; closed triangles, Hed1 foci in wild type; open  
27 triangles, Hed1 foci in *srs2*; open square, Hed1 aggregates in *srs2*.

28  
29 **Supplemental Figure S3. Rad51 staining in *srs2 ndt80* mutant.**

30 A. Immunostaining analysis of Rad51 (red) and Nop1 (green) on chromosome  
31 spreads in *srs2* (HSY310/315) cells. Representative image with or without  
32 DAPI (blue) dye at 7 h for wild type and the *srs2* is shown. The bar indicates  
33 2  $\mu$ m.

- 1 B. Immuno-staining analysis of Rad51 in *spo11-Y135F srs2* (HSY452/453) cells  
2 at 4 h.
- 3 C. Immunostaining analysis of Rad51 (green) and Dmc1 (red) on chromosome  
4 spreads in wild type (NKY1303/1543) and *SGS1-mn* (YFY03/05) cells.  
5 Representative images with or without DAPI (blue) dye at 4 and 7 h for wild  
6 type and the *srs2* cells are shown.
- 7 D. Kinetics of Rad51 foci-positive cells in *SGS1-mn* (YFY03/05) cells. The  
8 kinetics of Rad51 focus positive spreads were analyzed as shown in Figure  
9 2B. Wild-type (closed circles); *SGS1-mn* (open circles).
- 10 E. Immunostaining analysis of Rad51 (green) on chromosome spreads in *ndt80*  
11 (HSY596/597) and *srs2 ndt80* (LPY058/059) cells. Representative image  
12 with or without DAPI (blue) dye at 4, 6, and 8 h for each strain is shown.
- 13 F. Kinetics of Rad51 focus-positive cells in *ndt80* (HSY596/597) and *srs2 ndt80*  
14 (LPY058/059) cells. Spreads containing Rad51 foci were counted also. A  
15 minimum of 100 cells were analysed at each time point. Graphs show  
16 kinetics of one independent experiment.

17

18 **Supplemental Figure S4. Immuno-staining analysis of Rad51 and**  
19 **Zip1/Rec8 in *srs2 CDC20mn* cells.**

- 20 A. Immuno-staining analysis of Rad51 and Zip11 in wild type (NKY1303/1543)  
21 and *srs2* (HSY310/315) cells. The chromosome spreads immuno-stained  
22 against Rad51 (green) as well as chromosome protein Zip1 (red) are shown.
- 23 B. Immuno-staining analysis of Rad51 and Red1 in wild type (NKY1303/1543)  
24 and *srs2* (HSY310/315) cells. The chromosome spreads immuno-stained  
25 against Rad51 (green) as well as chromosome protein Red1 (red) are  
26 shown.
- 27 C. Kinetics of Rad51 aggregate-positive cells in Red1-positive spreads.  
28 Rad51-focus and Rad51-aggregate positive spreads were classified into  
29 Red1-negative (open bars) and Red1-positive (closed bars) at each time  
30 point.
- 31 D. Immuno-staining analysis of Rad51 and Rec8 in wild type (NKY1303/1543)  
32 and *srs2* (HSY310/315) cells. The chromosome spreads immuno-stained  
33 against Rad51 (green) as well as chromosome protein Rec8 (red) are shown.

1 E. Immuno-staining analysis of Rad51 and Rec8 in *CDC20mn* (YFY74/77) and  
2 *srs2 CDC20mn* (YFY80/83) cells. The chromosome spreads immuno-stained  
3 against Rad51 (green) as well as chromosome protein Rec8 (red) are shown.  
4

5 **Supplemental Figure 5. CHEF and CHEF-Southern blotting**

6 EtBr-staining of CHEF analysis of yeast chromosomes during meiosis.  
7 Chromosomal DNAs in yeast cells of wild type (NKY1303/1543) and *srs2*  
8 (HSY310/315) at each time point of meiosis were analyzed by CHEF gel  
9 electrophoresis and after the electrophoresis, the gels were stained with EtBr.  
10

Figure S1. Sasanuma/Sakurai

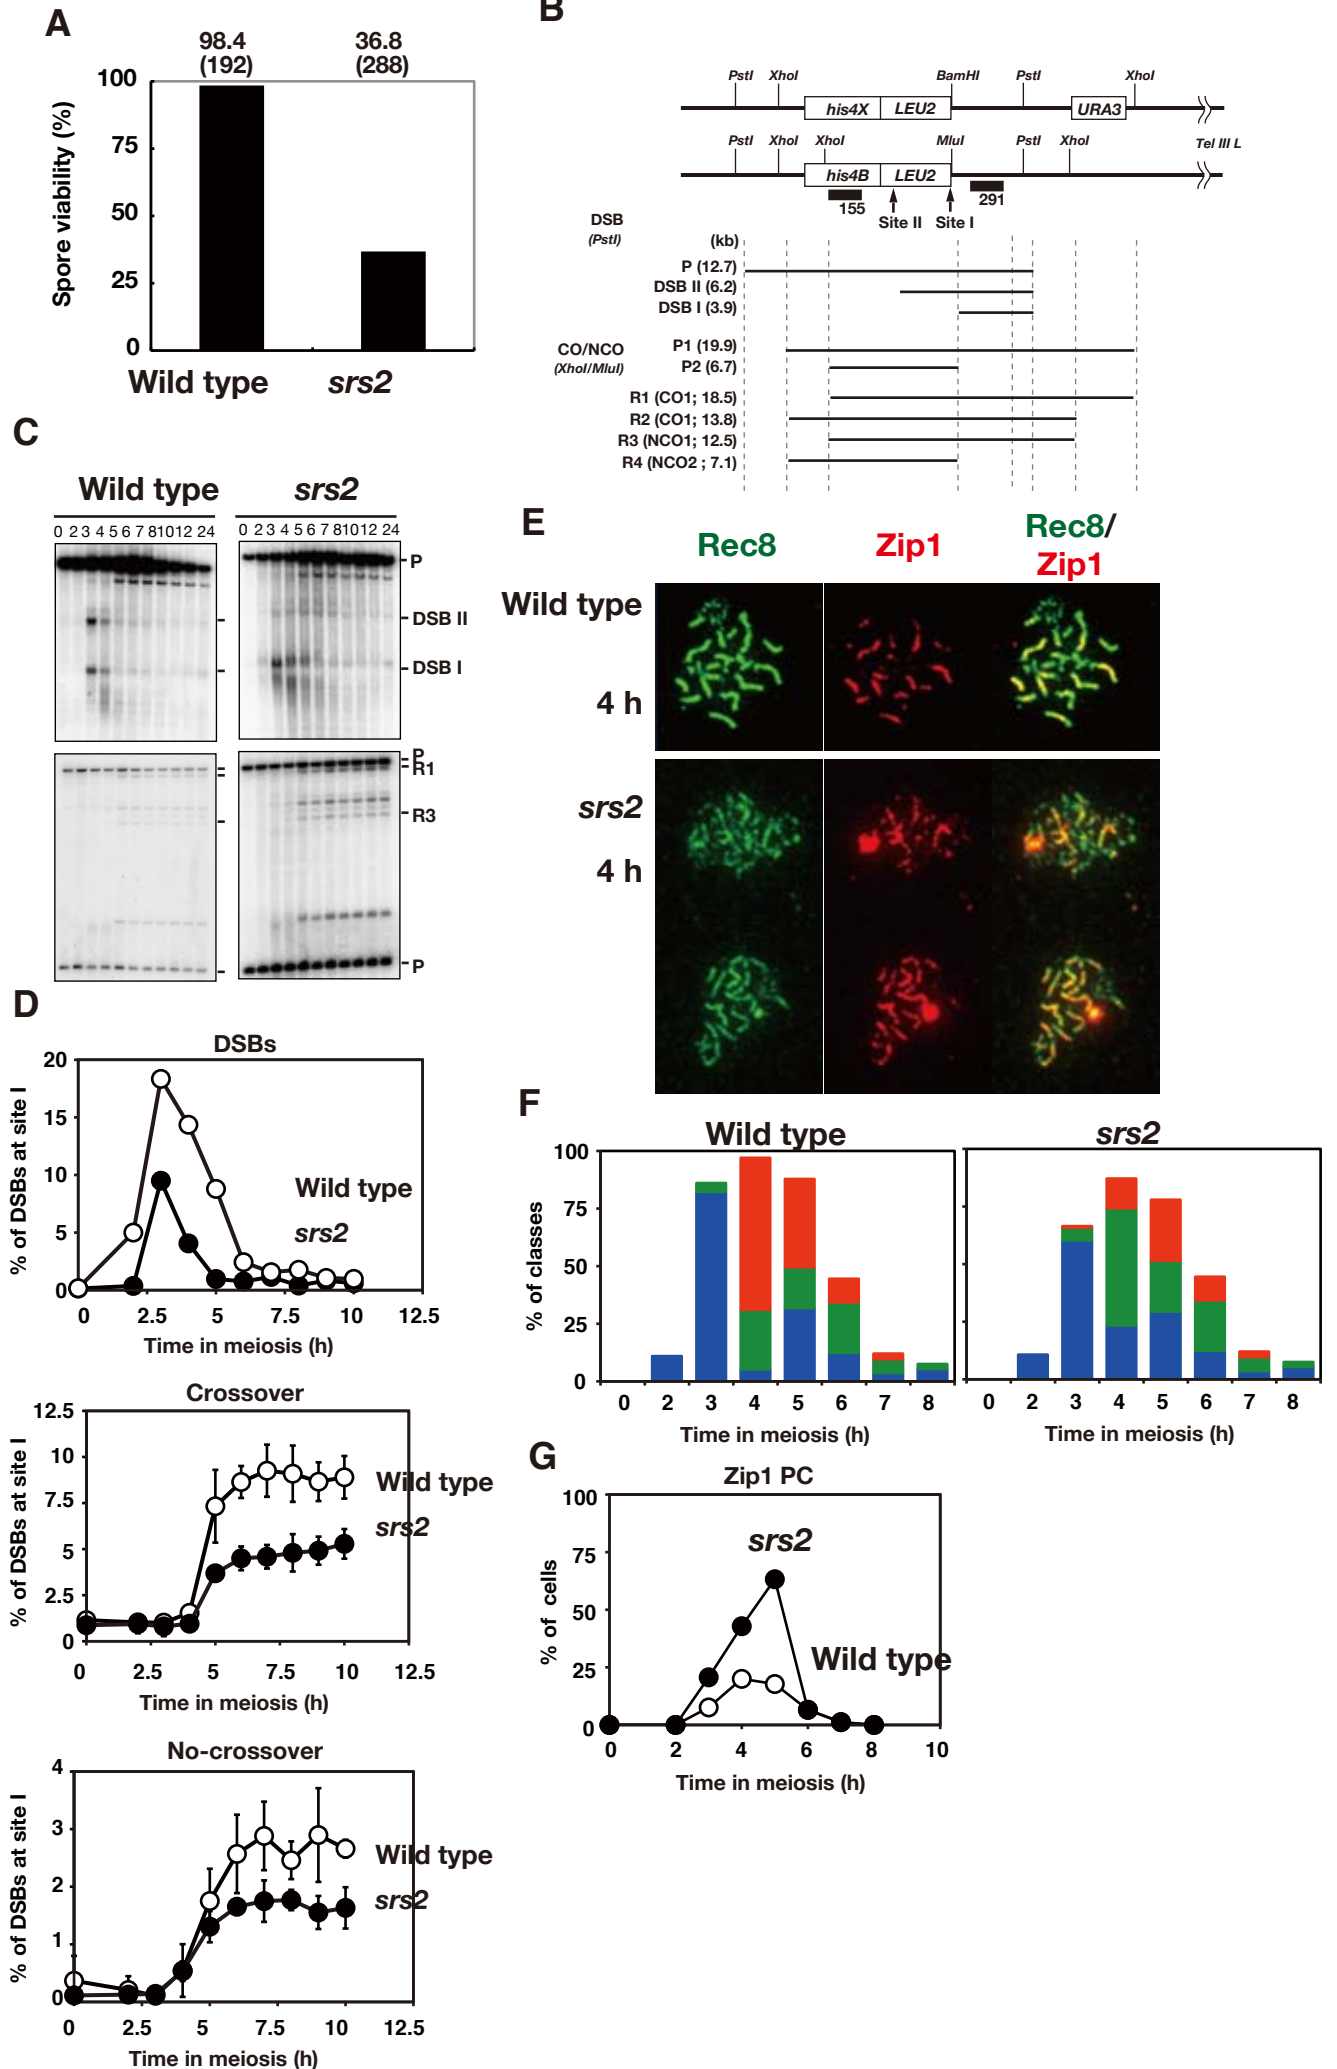

Figure S2. Sasanuma/Sakurai

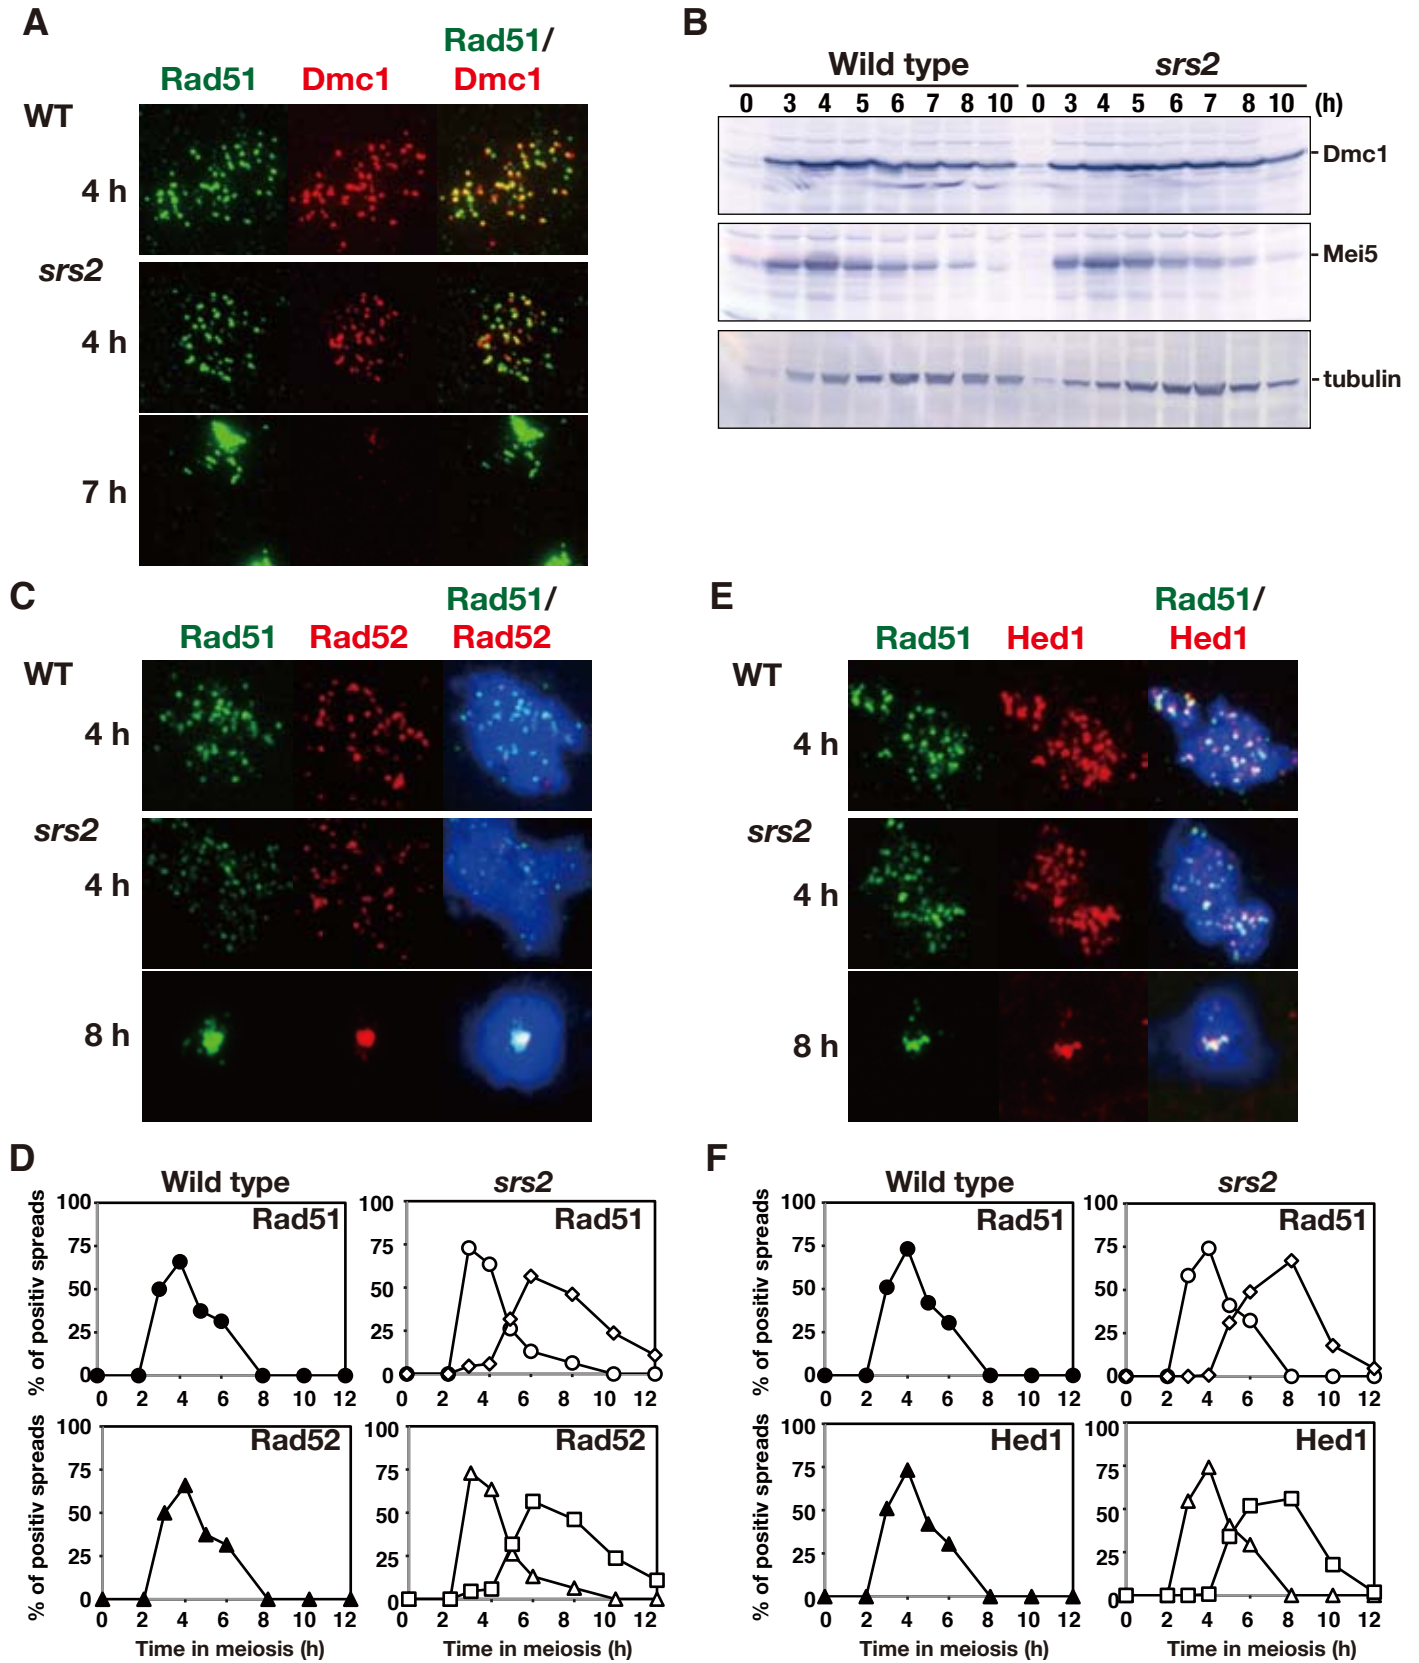



Figure S3. Sasanuma/Sakurai

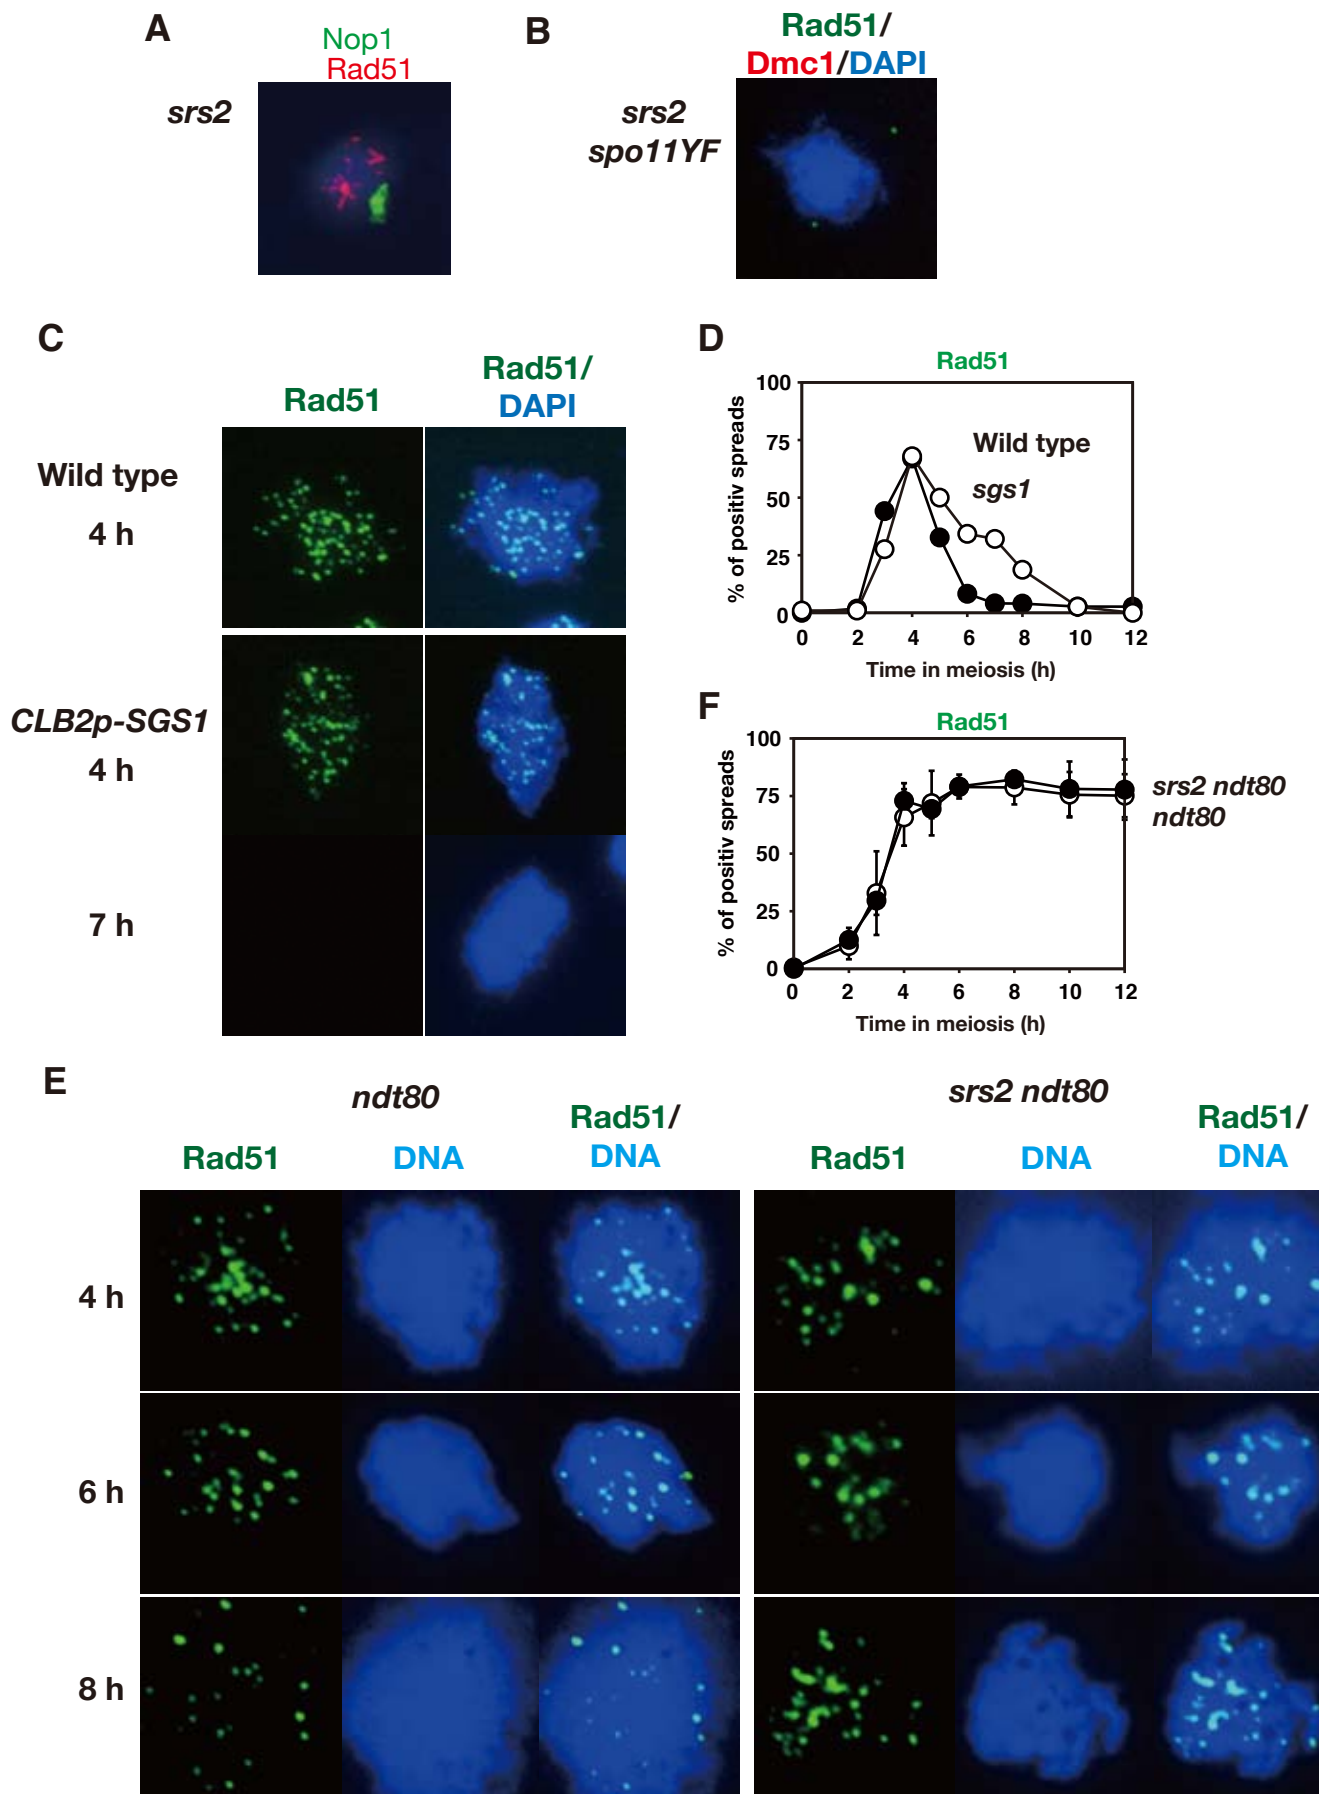

Figure S4. Sasanuma/Sakurai

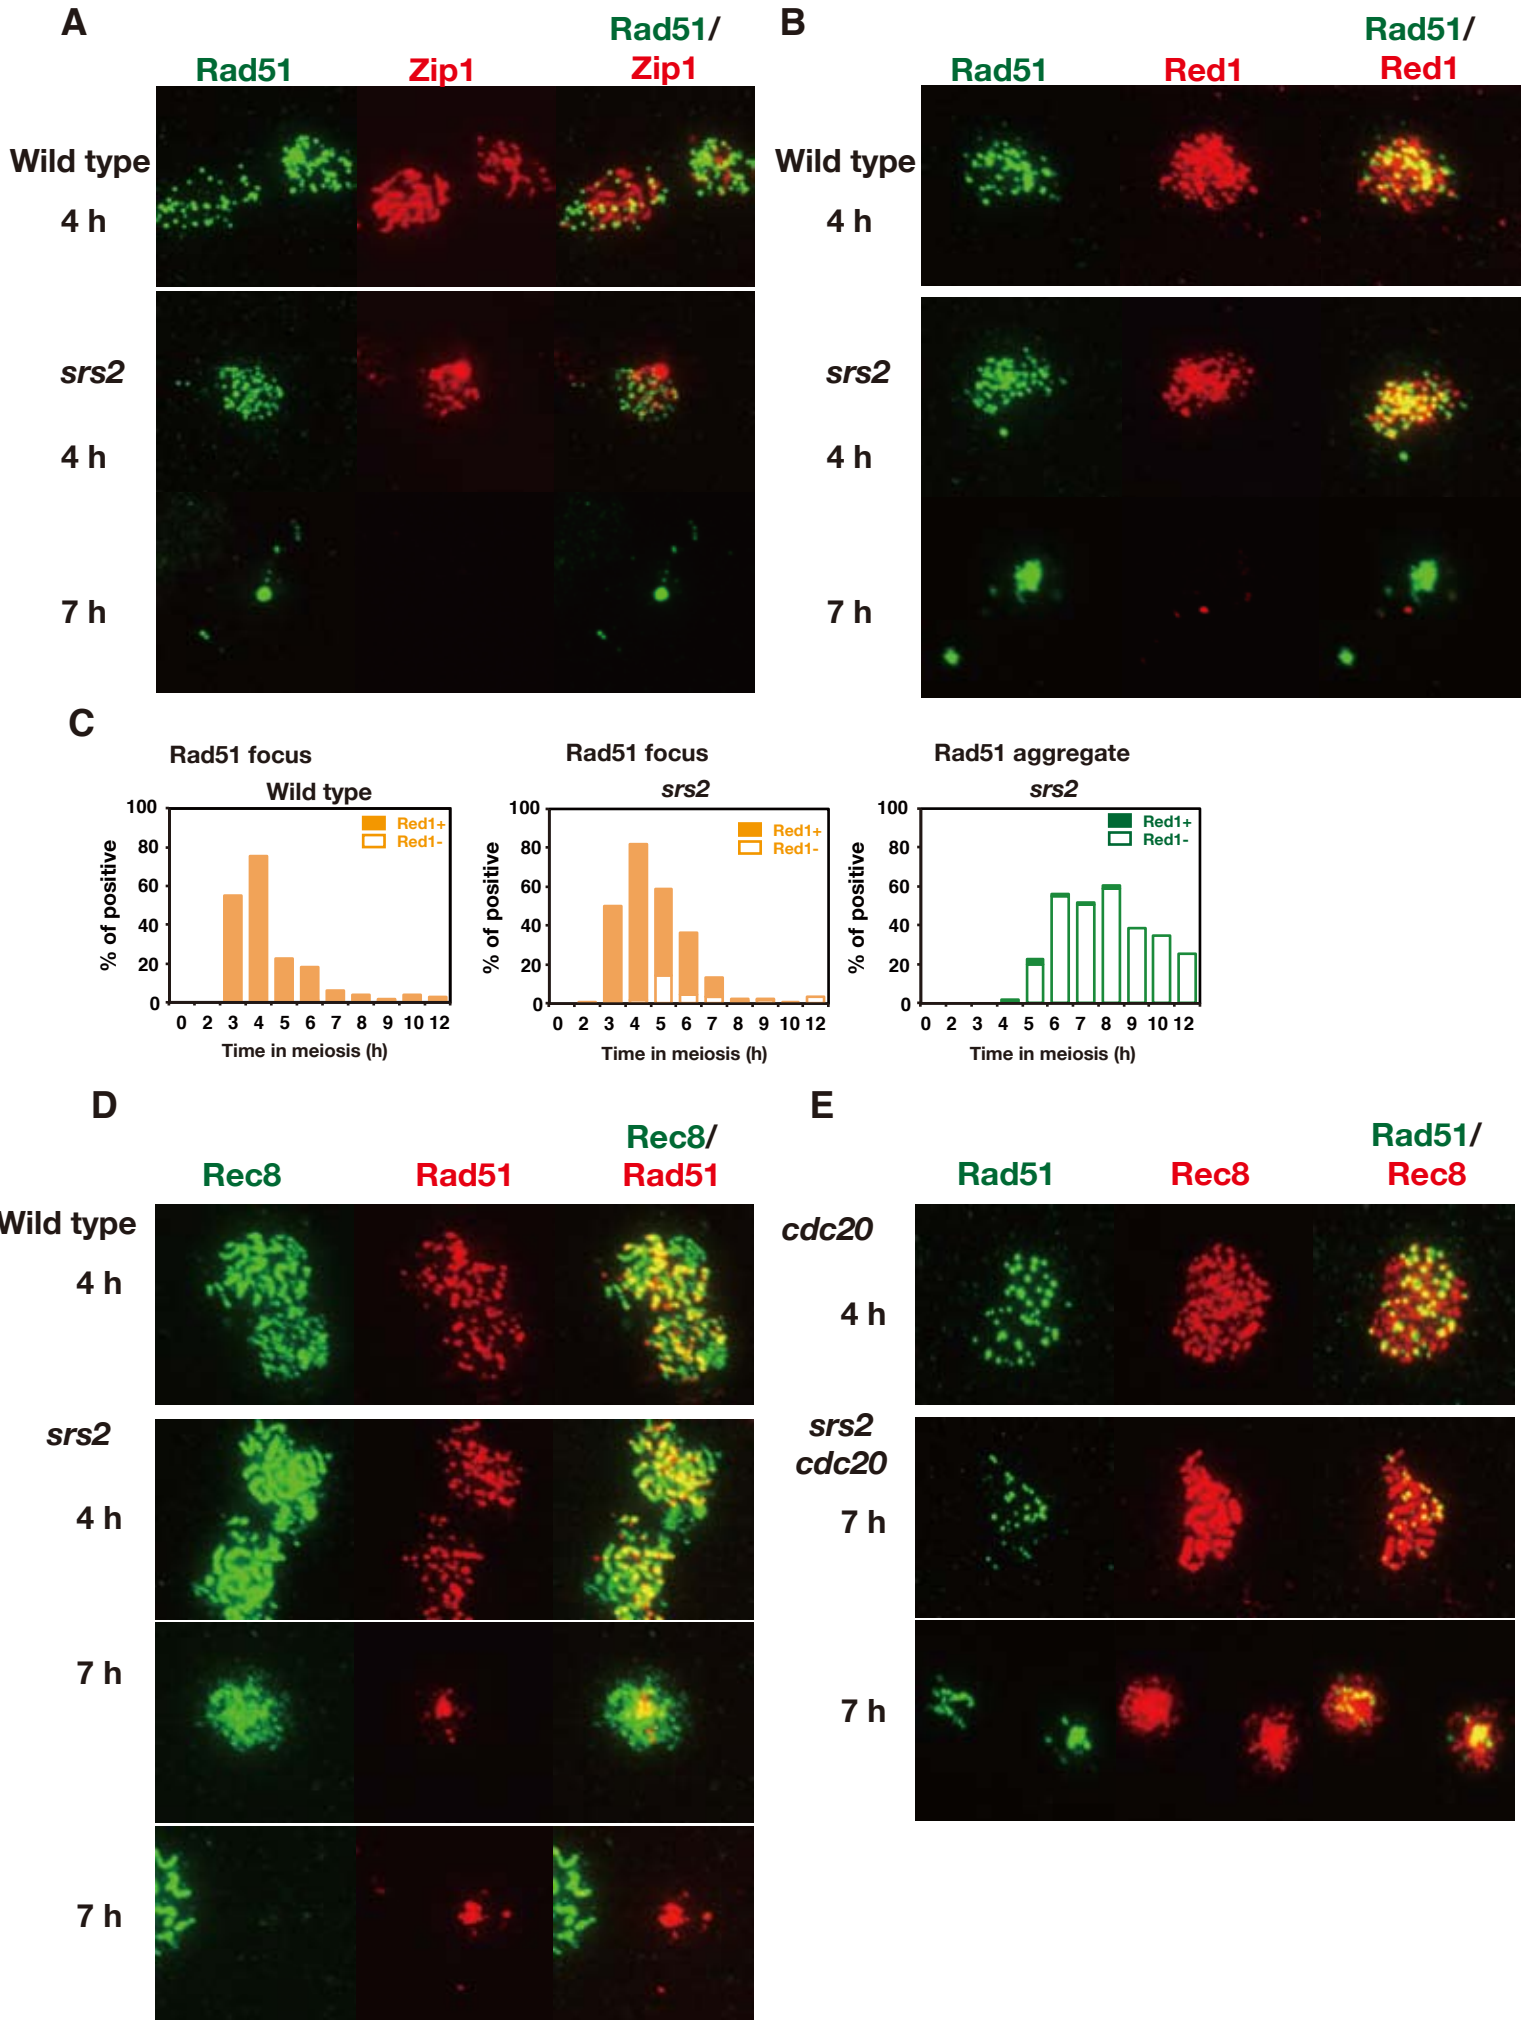

Figure S5. Sasanuma/Sakurai

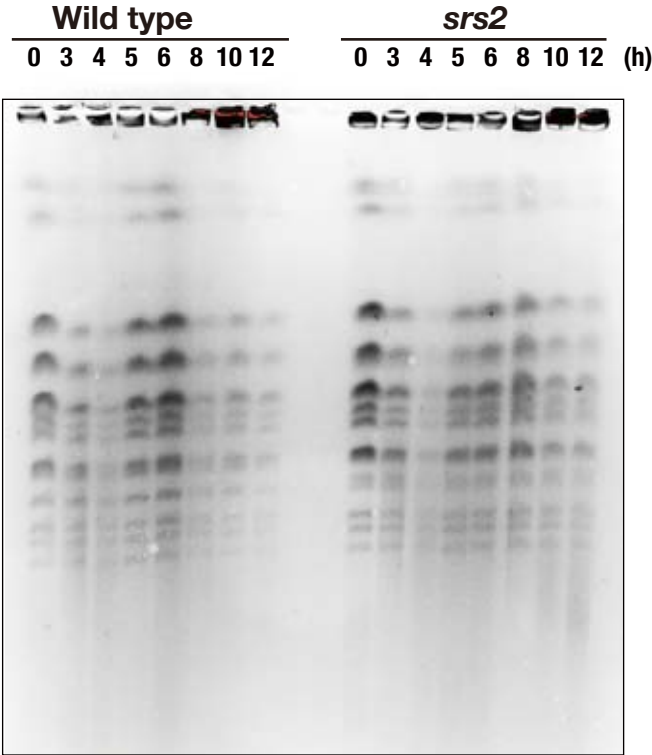

Supplement: Supplementary file [file media-1.pdf]
